# Supplementary material for: Human intermediate prostate cancer stem cells contribute to the initiation and development of prostate adenocarcinoma
Source: PubMed Central journal article supplement — Stem Cell Res Ther. 2024 Sep 11;15:296. doi: 10.1186/s13287-024-03917-8 (PMC11389492; doi:10.1186/s13287-024-03917-8), 2024-09-11

## Supplemental Materials for

### Human intermediate prostate cancer stem cells contribute to the initiation and development of prostate adenocarcinoma

Jie Mu<sup>1,2</sup>, Ruizhi Li<sup>1,3</sup>, Yu Zheng<sup>1,4</sup>, Yi Lu<sup>4</sup>, Lei Ma<sup>1,3</sup>, Lin Yin<sup>1,3</sup>, Miao Zhang<sup>1</sup>, Wenyu Ma<sup>1</sup>, Mengjia Chang<sup>1</sup>, Aihua Liu<sup>1,2\*</sup>, Jing Li<sup>1\*</sup>, Hai Zhu<sup>4\*</sup>, Dong Wang<sup>1\*</sup>

<sup>1</sup>Institute for Translational Medicine, School of Pharmacy, The Affiliated Hospital of Qingdao University, Medical College, Qingdao University, Qingdao 266071, China

<sup>2</sup>College of Life Sciences, Qingdao University, 308 Ningxia Road, Qingdao 266071, China

<sup>3</sup>School of Basic Medicine, Qingdao University, Qingdao, China 266021

<sup>4</sup>Department of Urology, Qingdao Municipal Hospital, Qingdao University, Qingdao, China 266011

\*Correspondence: dongwang@qdu.edu.cn (D.W.), shijingzhou@163.com (H.Z.), jingli@qdu.edu.cn (J.L.), and liuah@qdu.edu.cn (A.L.)

Table S1: The antibodies used in the study.

Table S2: The primers used in the study.

Figure S1: Uncropped blots of Figure 3, E.

Figure S2: Uncropped blots of Figure 6.

Table S1. The antibodies used in the study.

| Antibody | Supplier    | Source | Cat#       | Dilution |
|----------|-------------|--------|------------|----------|
| AR       | Abcam       | rabbit | ab108341   | 1:200    |
| PSA      | Proteintech | rabbit | 10679-1-AP | 1:100    |
| CK8      | Santa       | mouse  | Sc8020     | 1:50     |
| CK5      | BBI         | rabbit | D220236    | 1:100    |
| P63      | BBI         | rabbit | D125020    | 1:200    |
| SOX2     | Proteintech | rabbit | 11064-1-AP | 1:100    |

Table S2. The primers used in the study.

|      |                                                      |
|------|------------------------------------------------------|
| AR   | GGAGGCGACAGAGGGAAAAA; TTCACCGAAGAGGAAAGGGC           |
| ARV7 | CTACTCCGGACCTTACGGGGACATGCG; TGCCAACCCGGAATTTTTCTCCC |
| CK8  | TCCTCAGGCAGCTATATGAAGAG; GGTGGCAATATCCTCGTACTGT      |
| CK18 | TCGCAAATACTGTGGACAATGC; GCAGTCGTGTGATATTGGTGT        |
| PSA  | ACTCACAGCAAGGATGGAGC; TCCCATGCCAAAGGAAGACC           |
| CK5  | CCAAGGTTGATGCACTGATGG; TGTCAGAGACATGCGTCTGC          |
| P63  | GTCATTTGATTTCGAGTAGAGGGG; CTGGGGTGGCTCATAAGGT        |
| CHGA | TAAAGGGGATACCGAGGTGATG; TCGGAGTGTCTCAAACATTCC        |
| SYP  | TTAGTTGGGGACTACTCCTCG; GGCCCTTTGTTATTCTCTCGGTA       |
| IVL  | TCCTCCAGTCAATACCCATCAG; CAGCAGTCATGTGCTTTTCCT        |
| CK4  | CTCTTTGAGACCTACCTCAGTGT; GGCTGCTGTGCGTTTGTTG         |
| CK13 | GACCGCCACCATTGAAAACAA; TCCAGGTCAGTCTTAGACAGAG        |
| PSCA | CTGAGGCACATCCTAACGCA; TCAATAGAGCCGATCTGCCG           |
| SOX2 | CCCCCGGCGGCAATAGCA; TCGGVGCCGGGAGATACAT              |
| KI67 | GAAAGAGTGGCAACCTGCCTTC; GCACCAAGTTTTACTACATCTGCC     |
| PCNA | CAAGTAATGTGCGATAAAGAGGAGG; GTGTCACCGTTGAAGAGAGTGG    |

Figure S1: Uncropped blots of Figure 3, E.

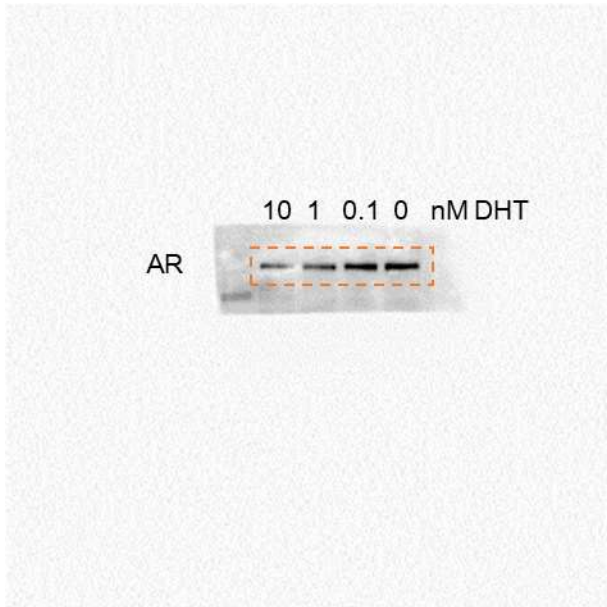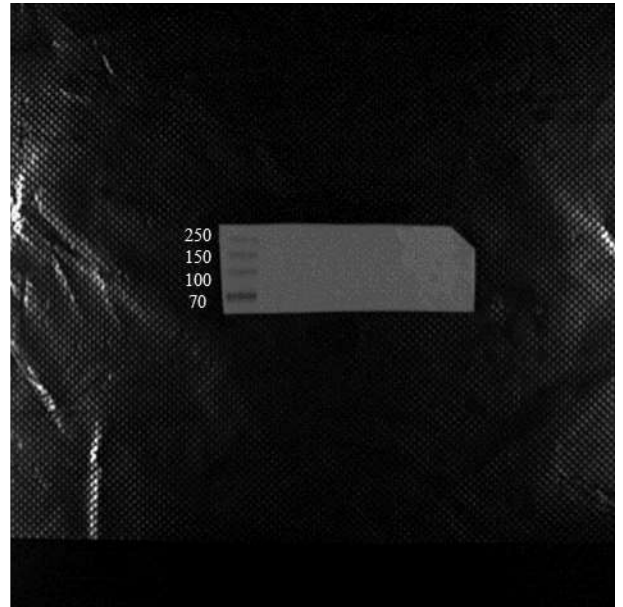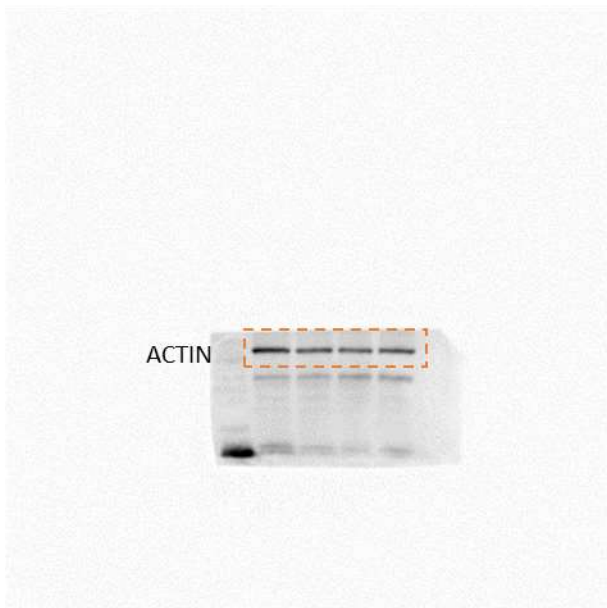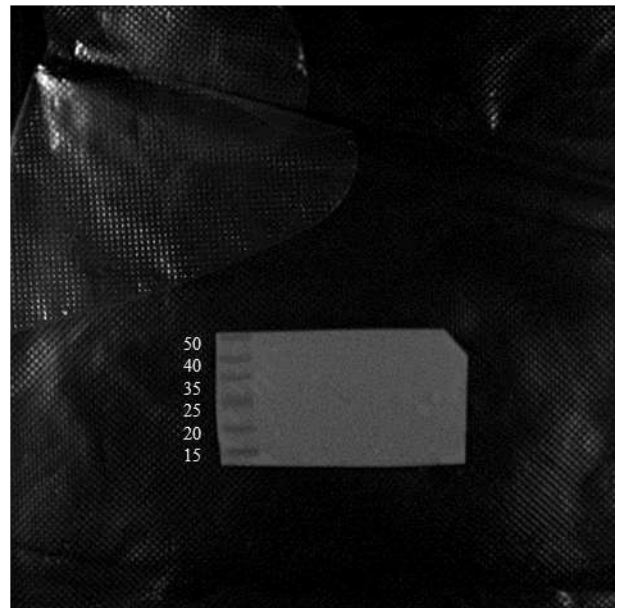

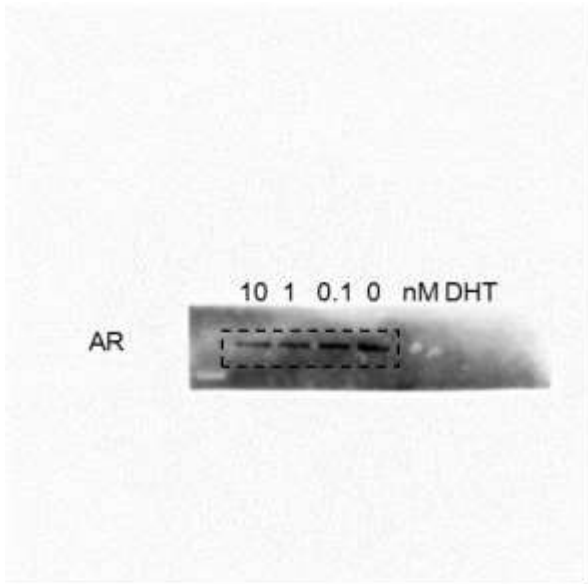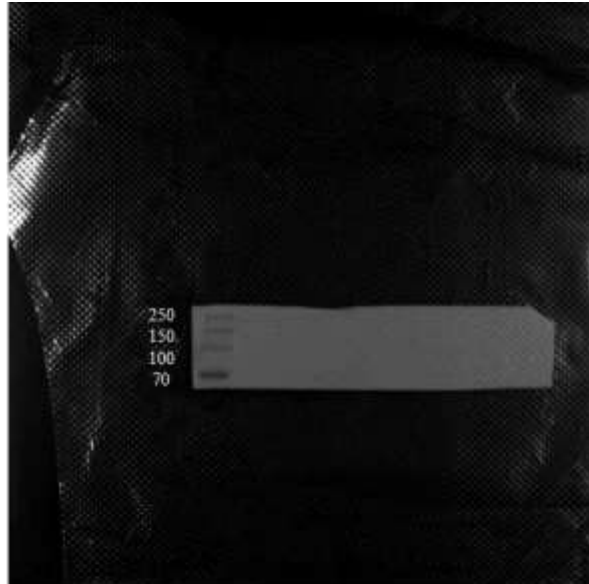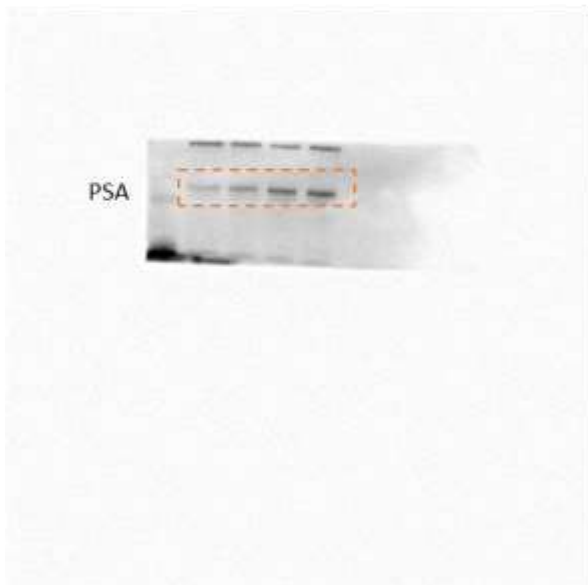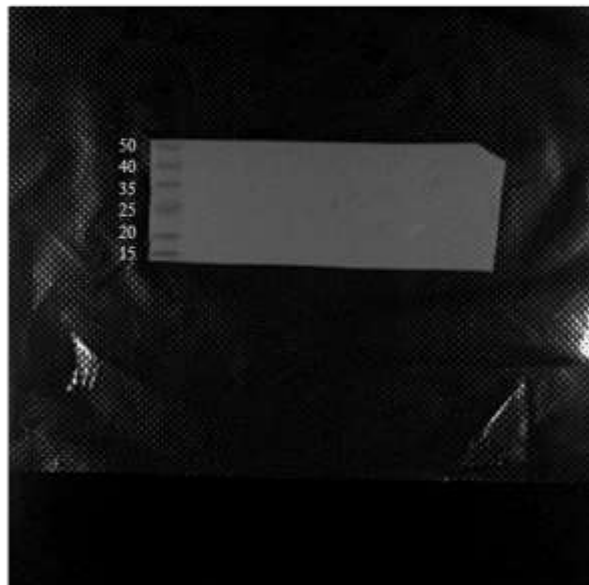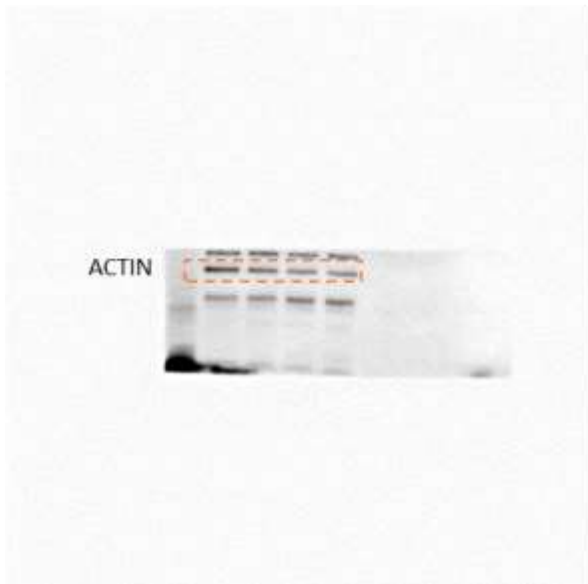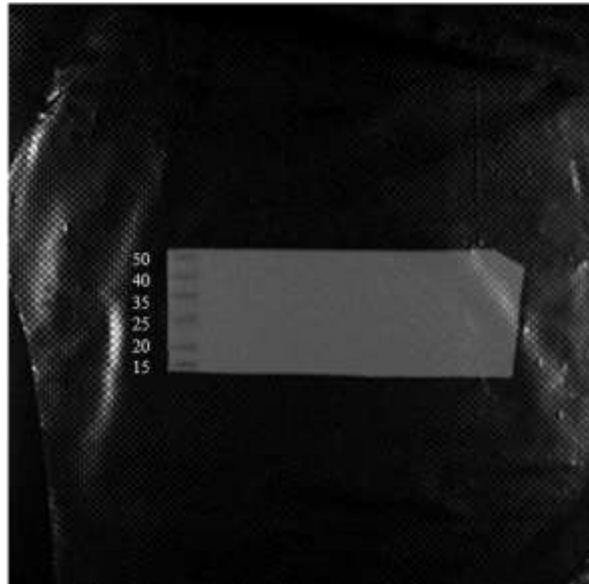

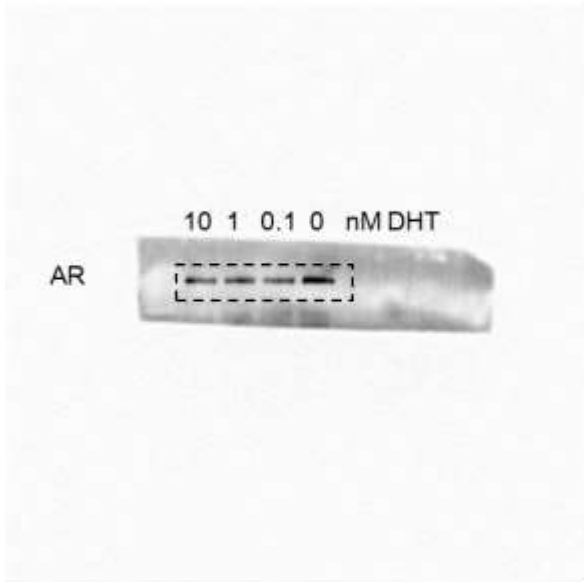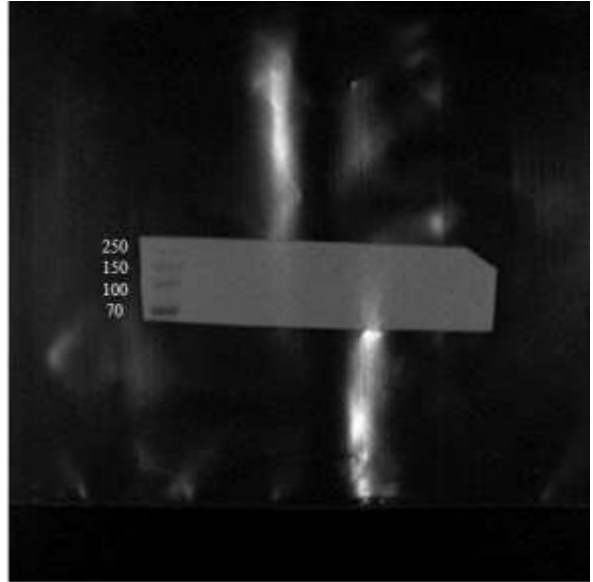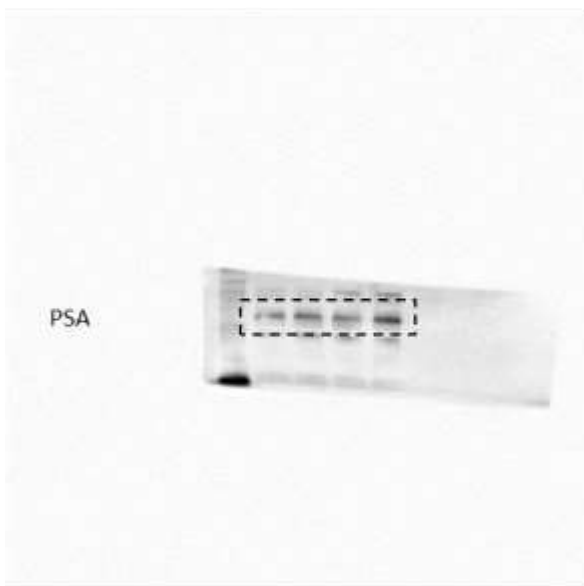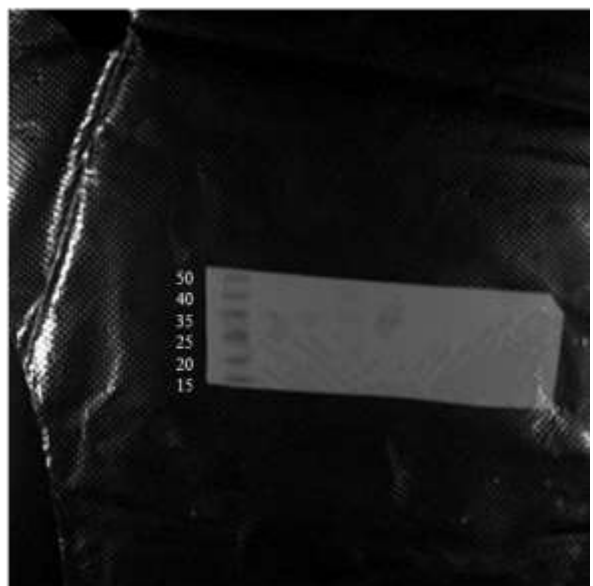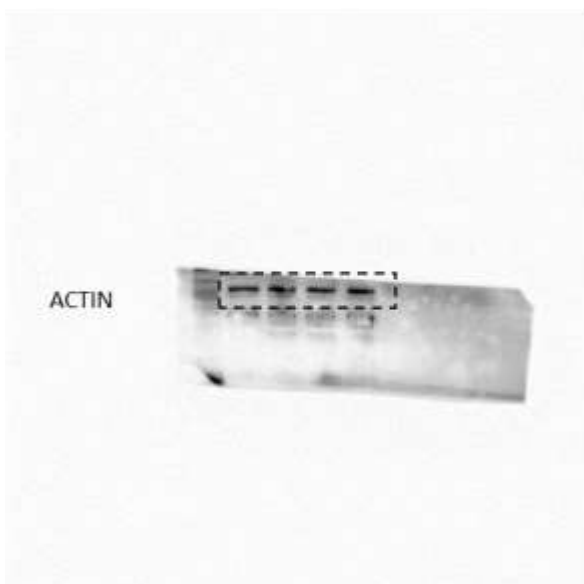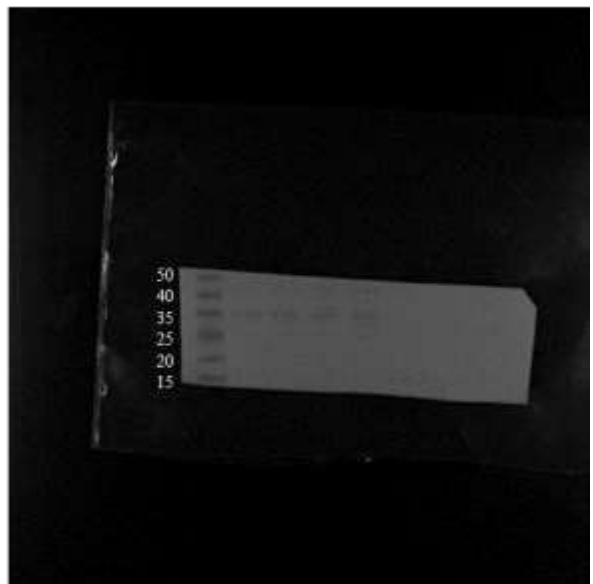

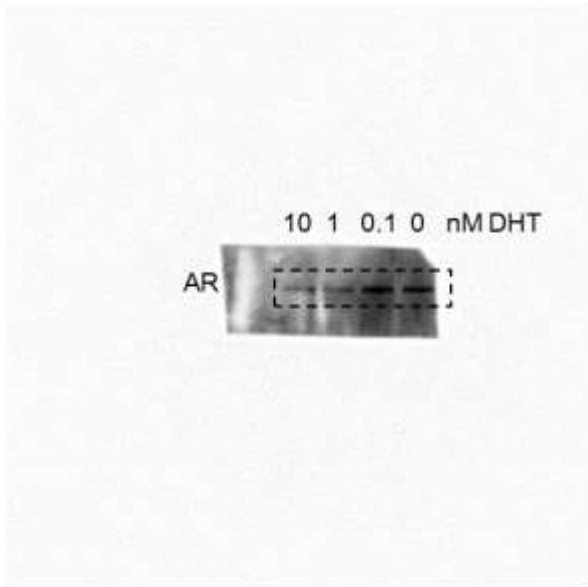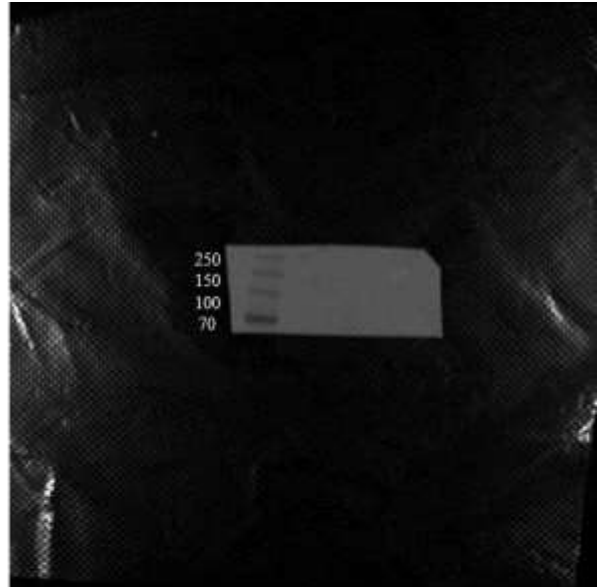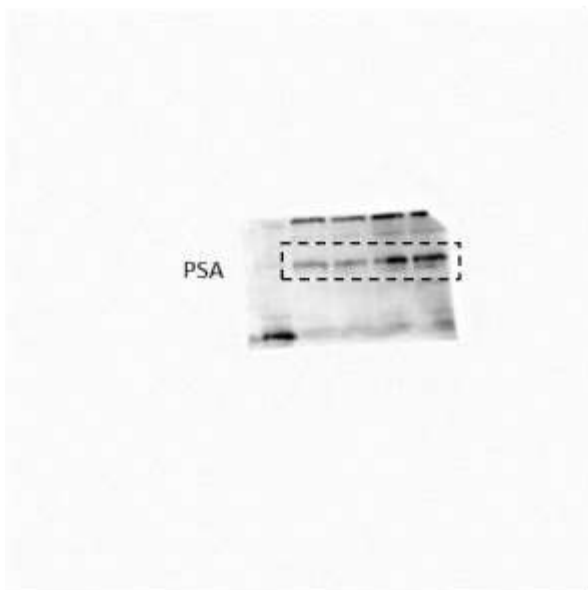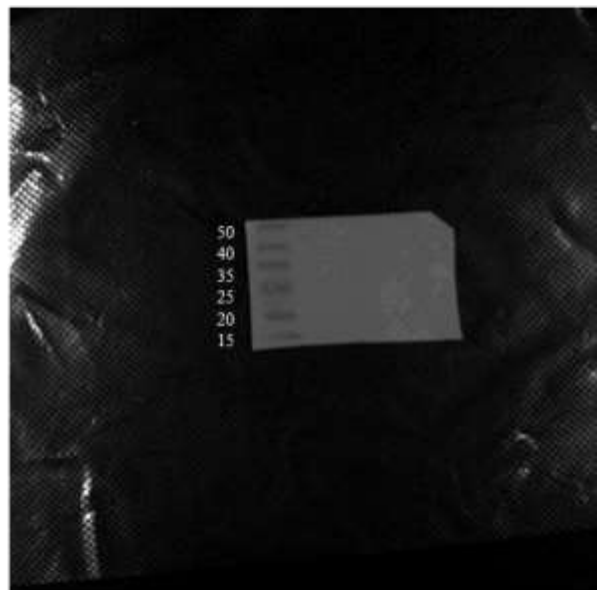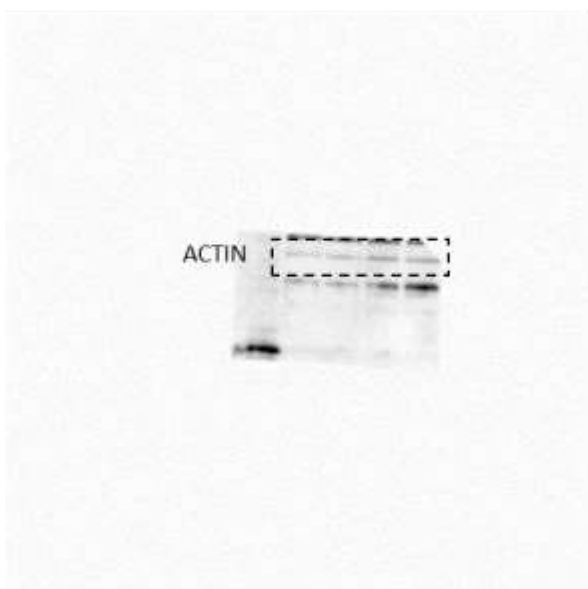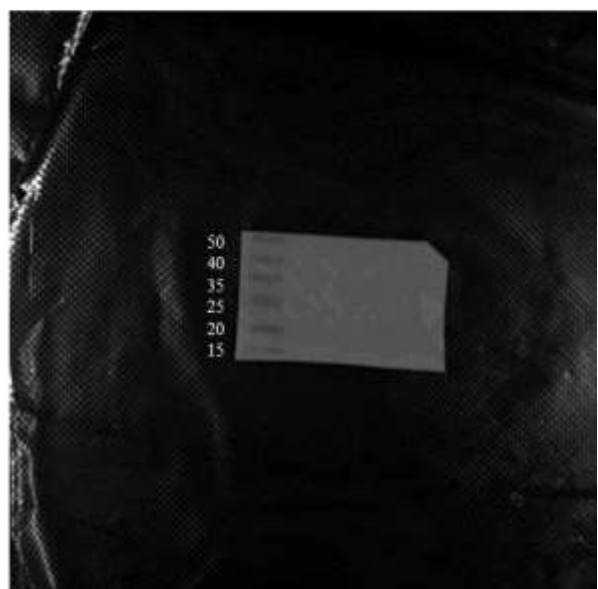

Figure S2: Uncropped blots of Figure 6.

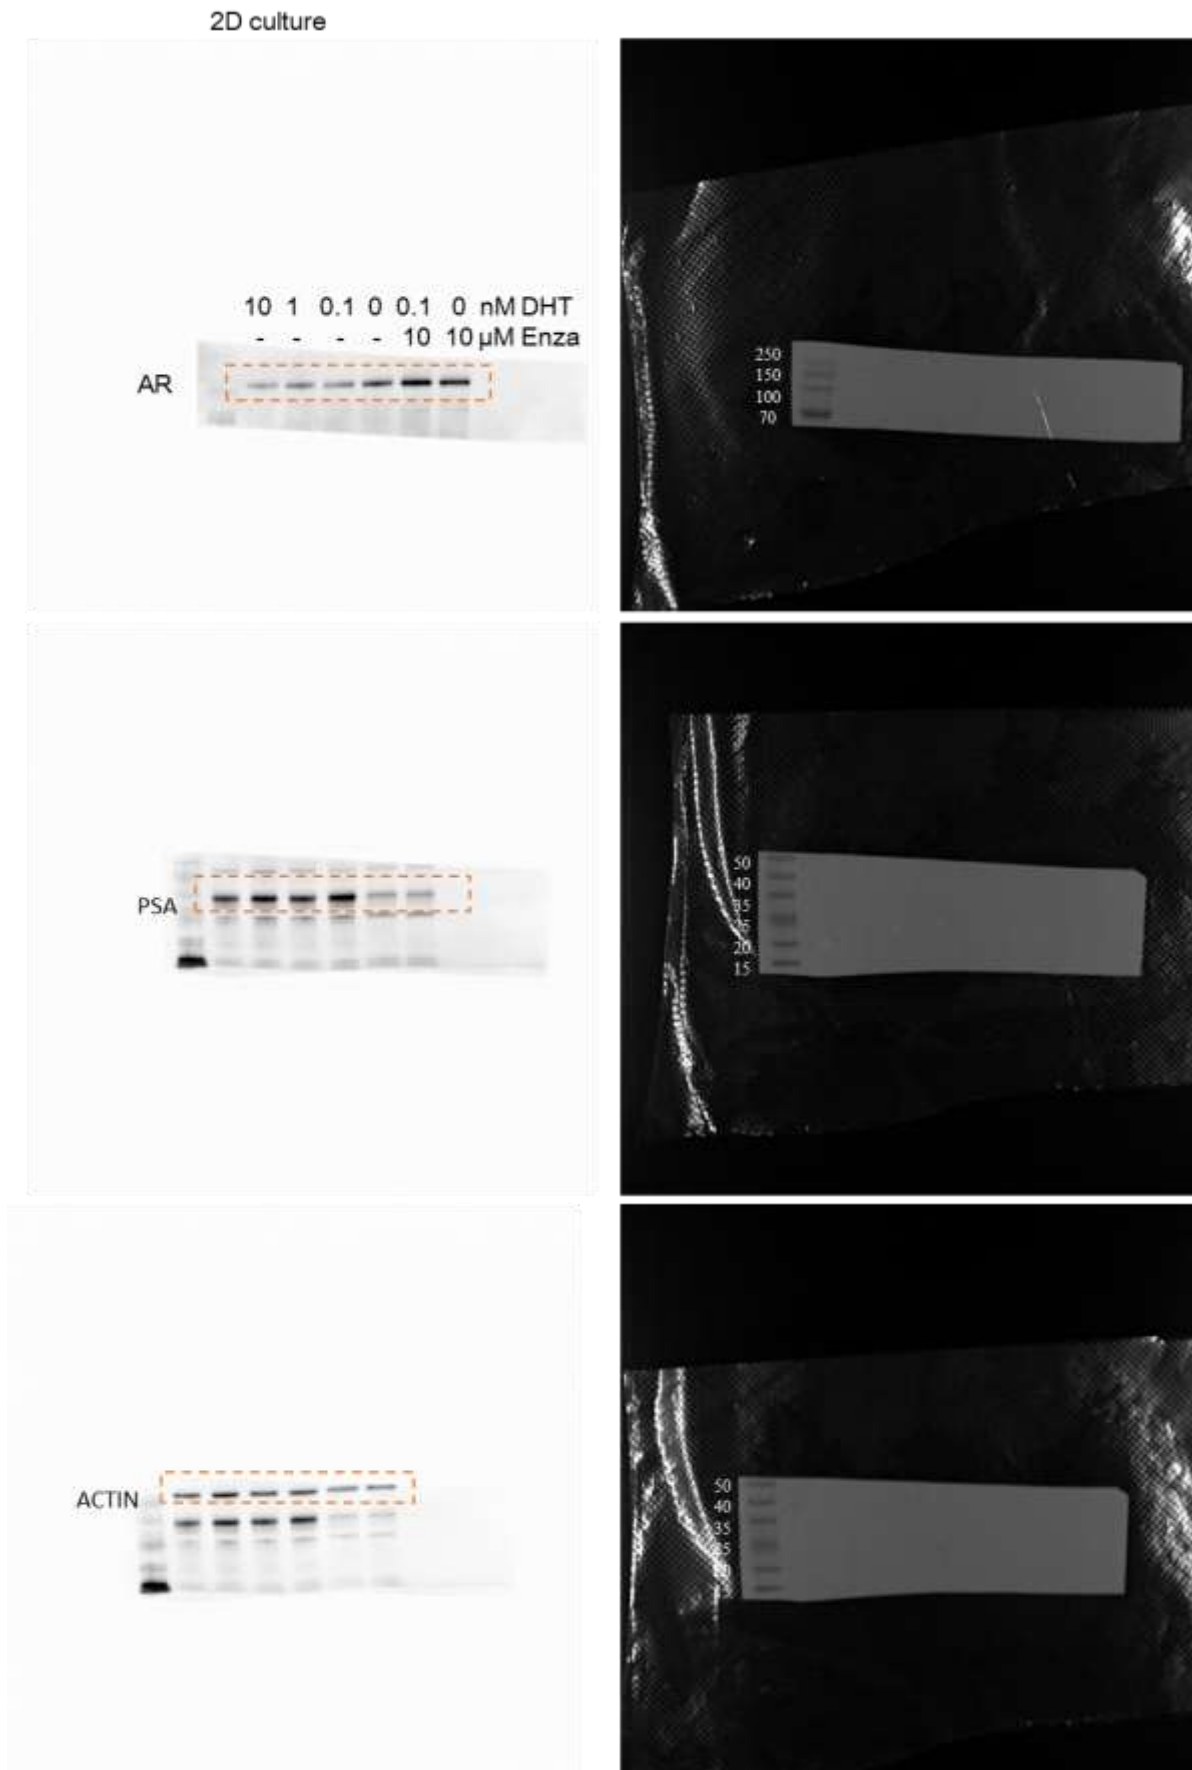

2D culture

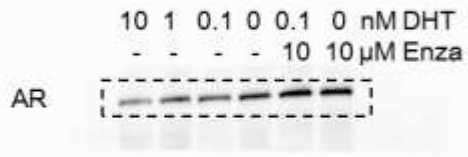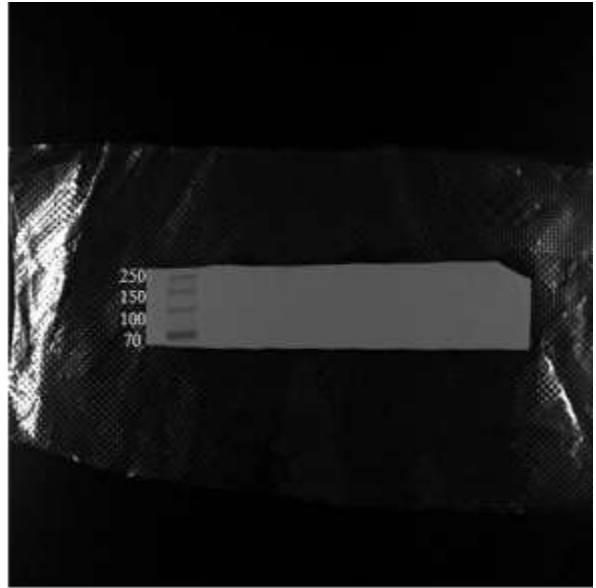

PSA

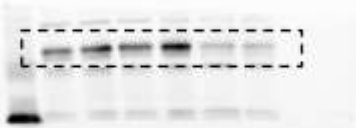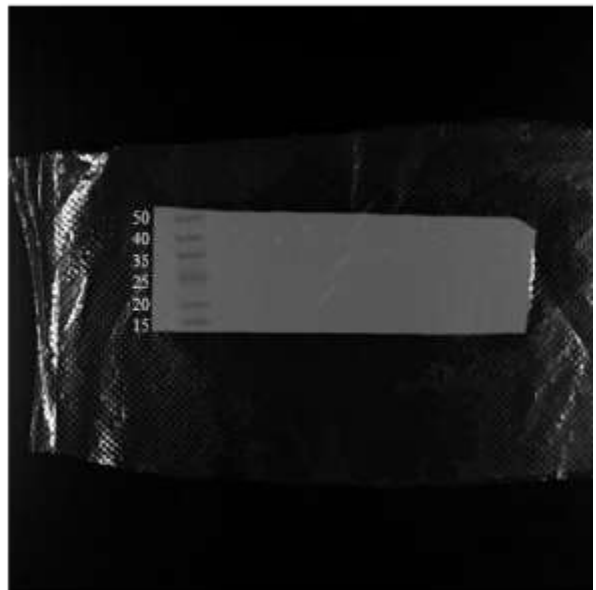

ACTIN

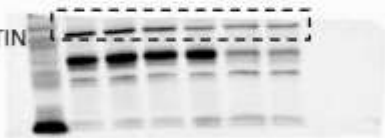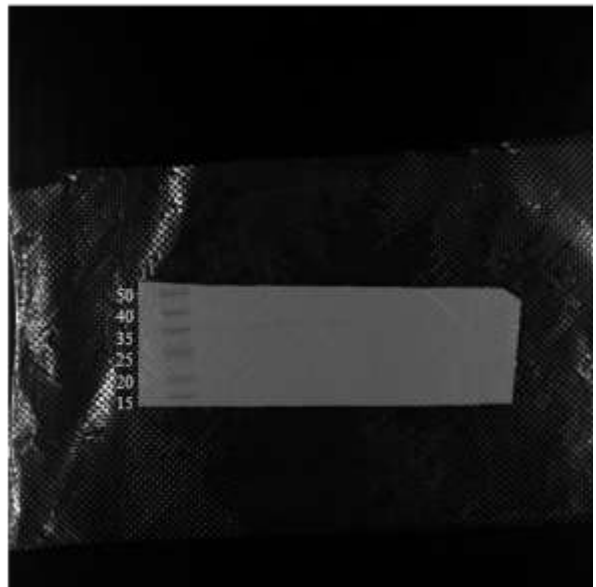



2D culture

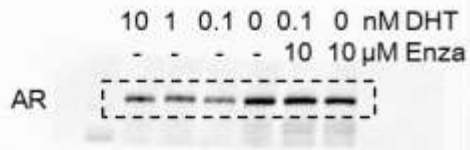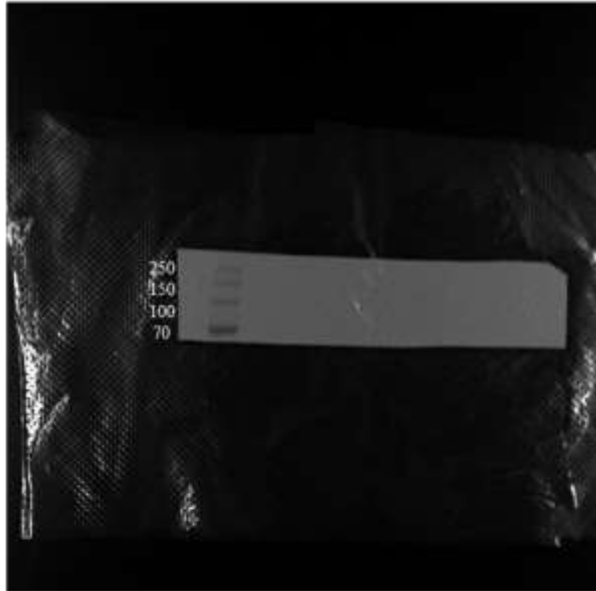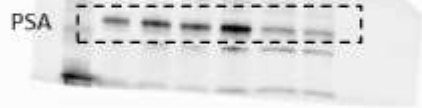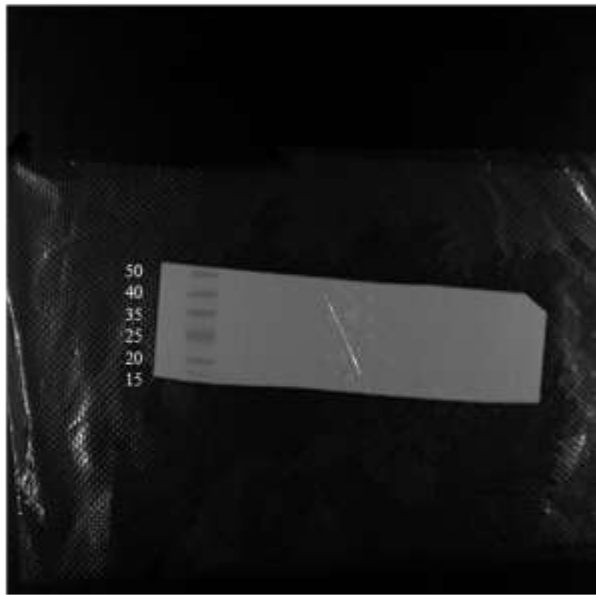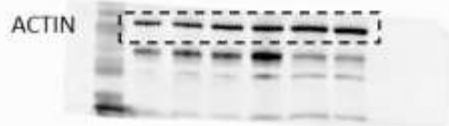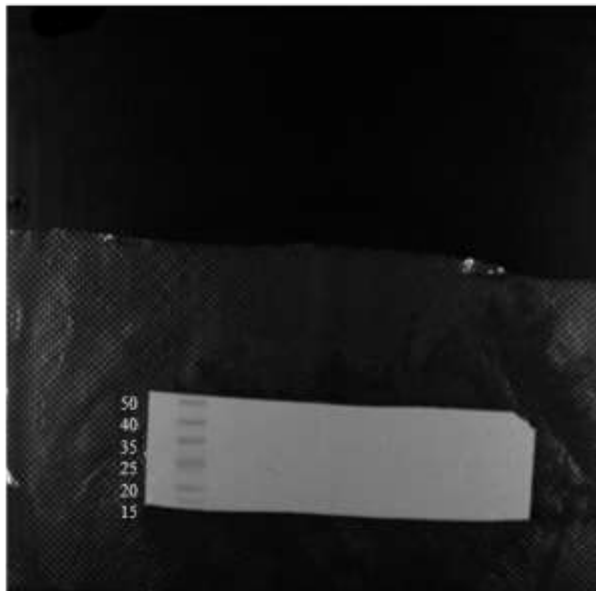

3D culture

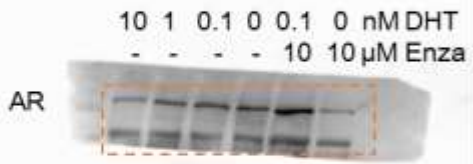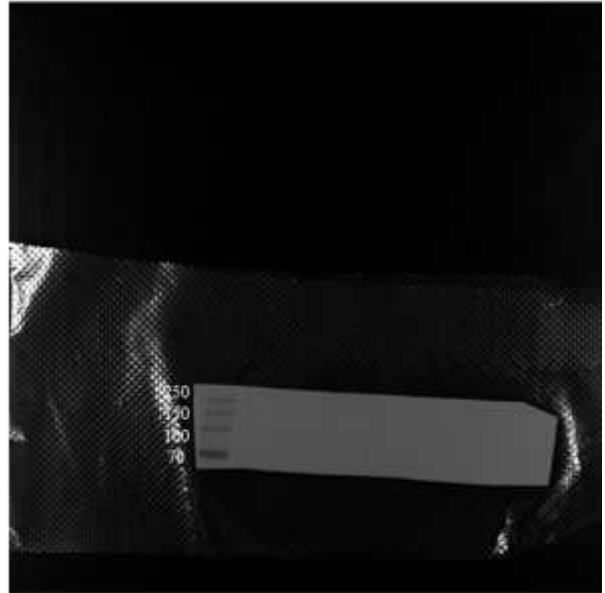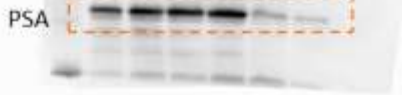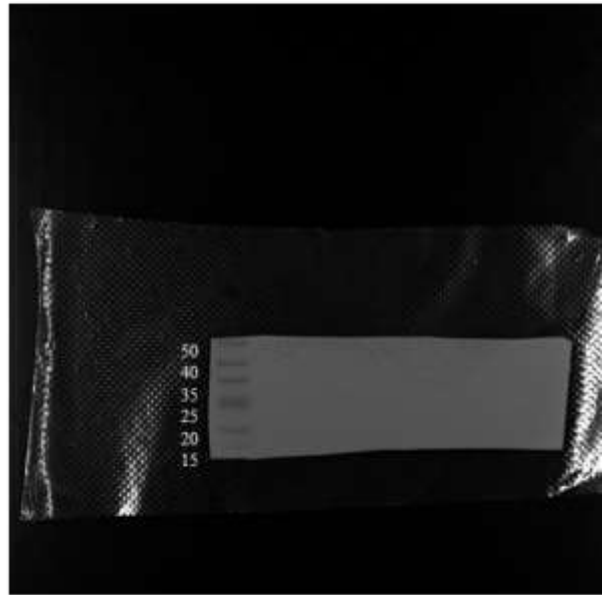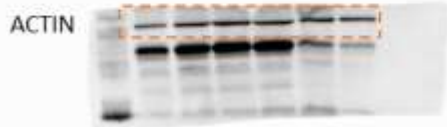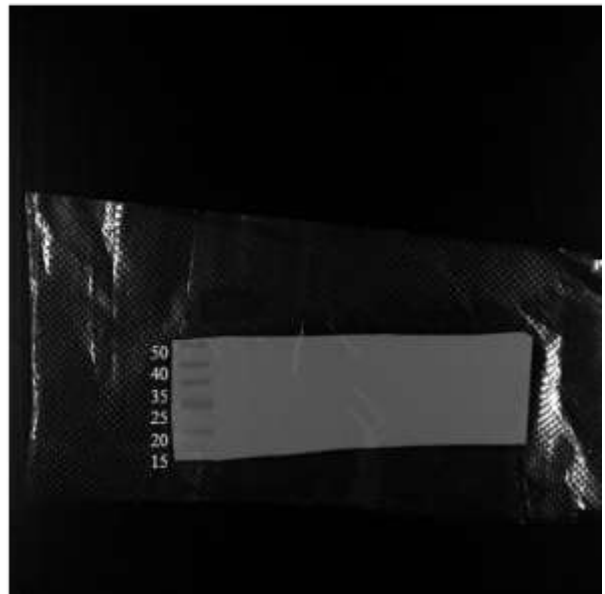

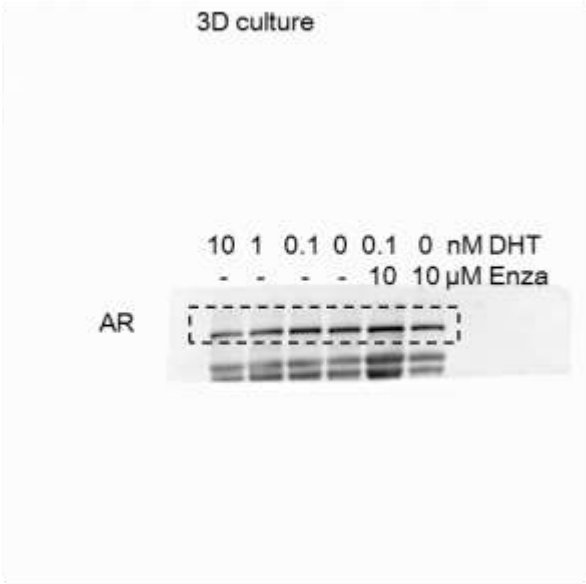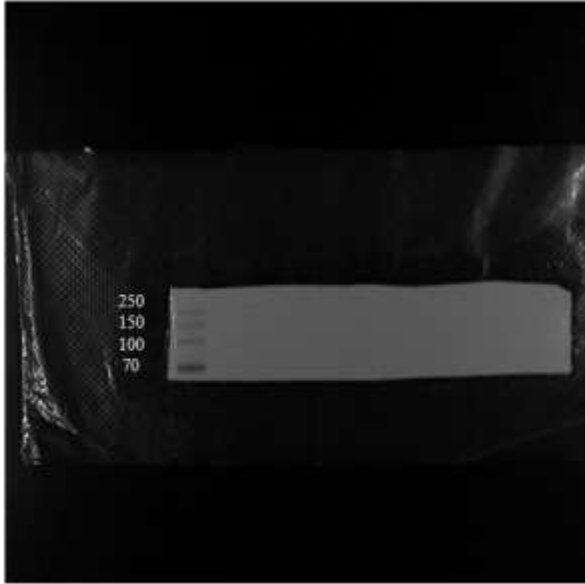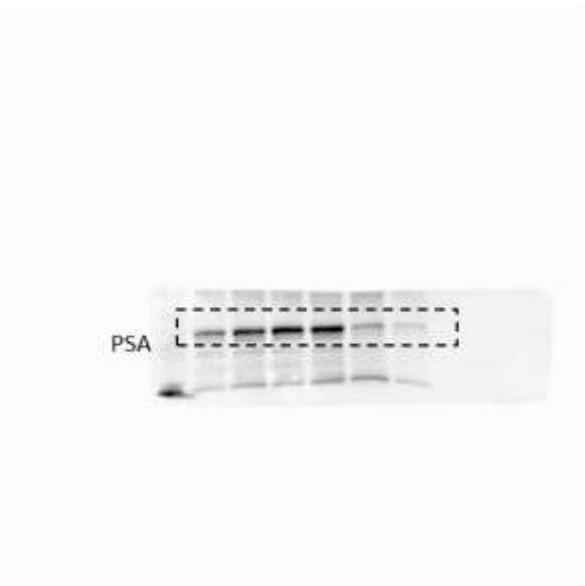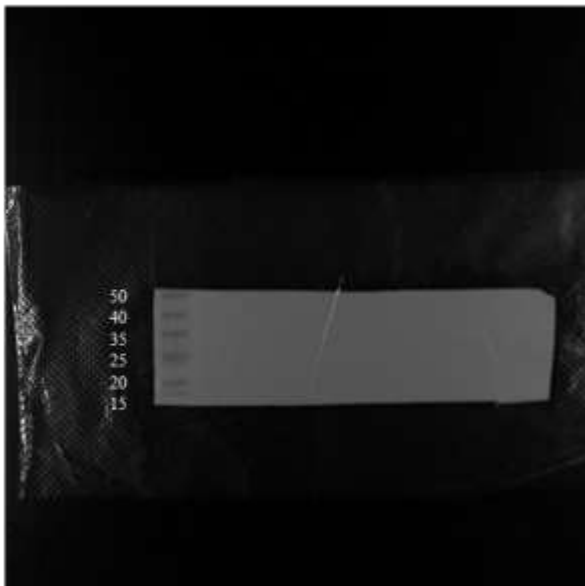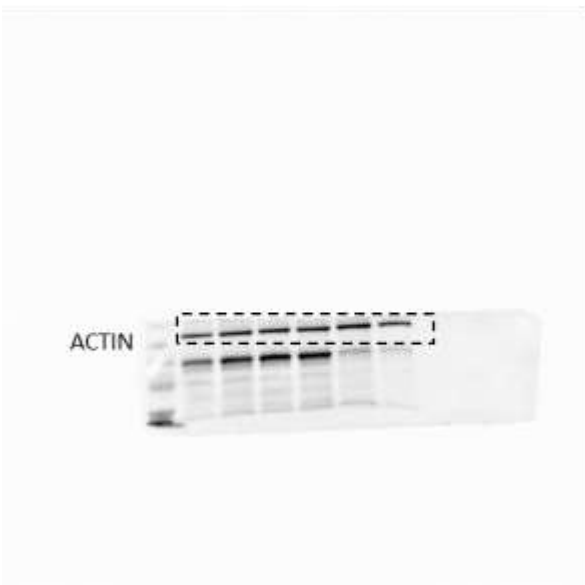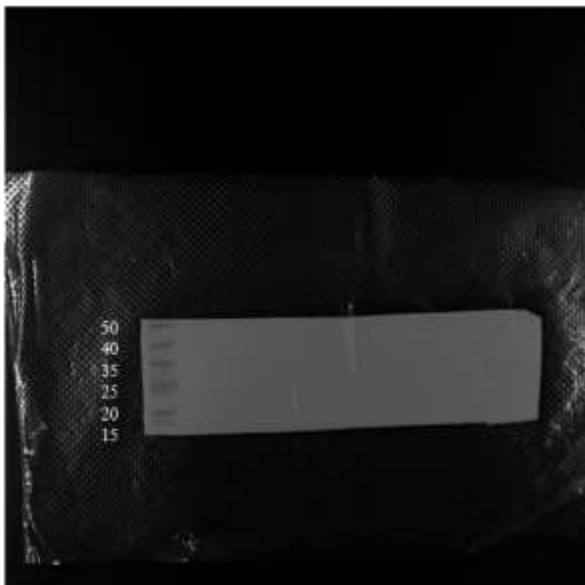

3D culture

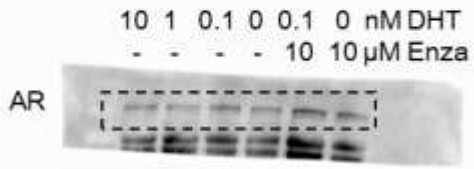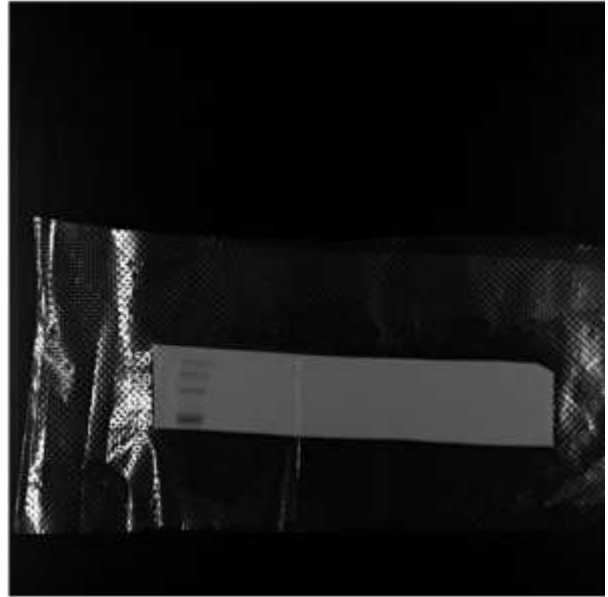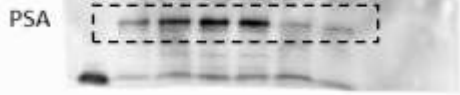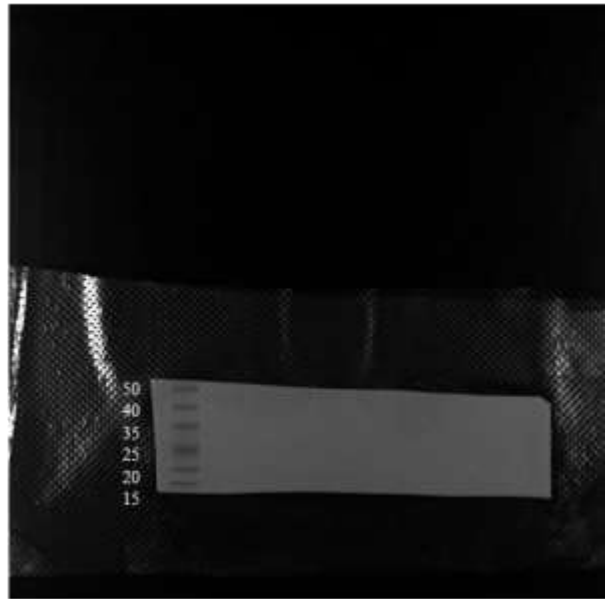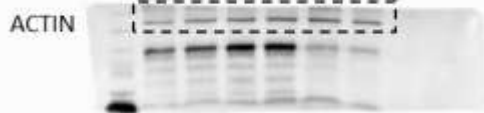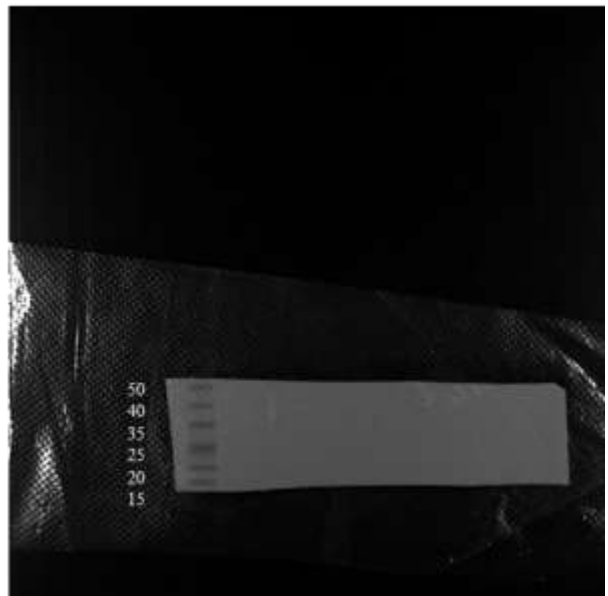

Supplement: 13287_2024_3917_MOESM2_ESM.pdf [file 13287_2024_3917_MOESM2_ESM.pdf]
